# Supplementary material for: Effects of veridical expectations on syntax processing in music: Event-related potential evidence
Source: PubMed Central journal article supplement (PMC4726113; doi:10.1038/srep19064), 2016-01-19
Supplement: srep19064-s1.pdf [file srep19064-s1.pdf]

1 **Effects of veridical expectations on syntax processing in music:**  
2 **Event-related potential evidence**

3 Shuang Guo<sup>\*</sup>, Stefan Koelsch

4

5 **Supplementary Information**

6 **Figure**

musicians (penultimate chord)

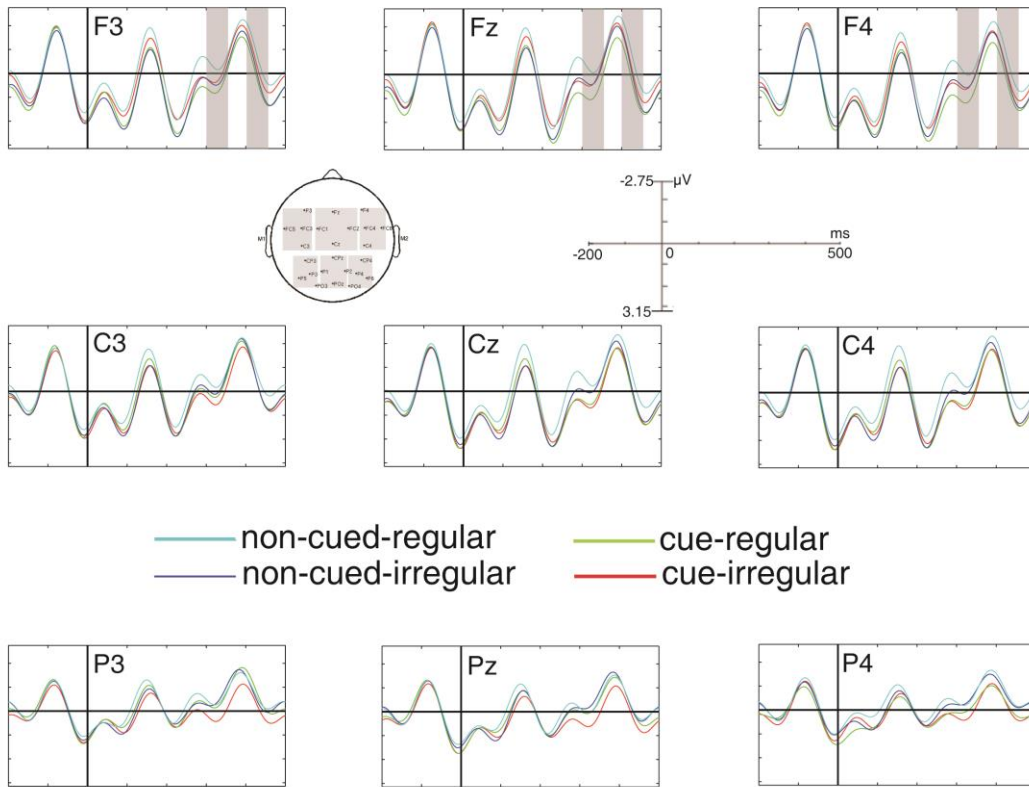

7

8 **Figure S1.** Grand-average of ERPs elicited by the penultimate chord (the dominant chord before  
9 the final tonic chord) in musicians. The cyan waveform shows ERPs evoked by regular chords in  
10 the non-cued condition, the blue waveform shows ERPs evoked by irregular chords in the  
11 non-cued condition, the green waveform shows ERPs evoked by regular chords in the cued  
12 condition, and the red waveform shows ERPs evoked by irregular chords in the cued  
13 condition. The ERPs elicited in the cued condition were larger than in the non-cued condition over anterior  
14 leads (indicated by gray-shaded areas). The inset shows the ROIs used for statistical analyses  
15 (shaded in light gray).

16

17

18

1 **Table**

2 **Table S1.** Summary of global ANOVAs for penultimate chord with factors regularity (regular,  
 3 irregular), cue (without cue, with cue), anterior-posterior distribution (anterior, posterior),  
 4 hemisphere (left, central, and right) and group (non-musicians, musicians). Only time windows  
 5 with significant results (main effects and interactions) are listed. Significance of *p* values is  
 6 indicated by asterisks (\* *p* < 0.05, \*\* *p* < 0.01, \*\*\* *p* < 0.001).

| Factors                                      | 50-100 ms |          | 250-300 ms |          | 300-350 ms |          | 400-450 ms |          |
|----------------------------------------------|-----------|----------|------------|----------|------------|----------|------------|----------|
|                                              | <i>df</i> | <i>F</i> | <i>df</i>  | <i>F</i> | <i>df</i>  | <i>F</i> | <i>df</i>  | <i>F</i> |
| Regularity                                   | 1,38      | 4.18*    | 1,38       | 3.94*    |            |          |            |          |
| Cue                                          |           |          |            |          | 1,38       | 5.05*    |            |          |
| Cue × AntPost                                |           |          |            |          | 1,38       | 3.89*    |            |          |
| Cue × Hem.                                   |           |          |            |          |            |          | 2,76       | 3.41*    |
| Regularity × Cue × AntPost                   |           |          | 1,38       | 4.71*    |            |          |            |          |
| Regularity × Cue × AntPost ×<br>Group        |           |          |            |          | 1,38       | 3.76*    | 1,38       | 7.79**   |
| Regularity × Cue ×<br>AntPost × Hem. × Group |           |          | 2,76       | 2.91*    |            |          |            |          |

7

8

9 **SI Text**

10 **Penultimate chord.** To investigate possible ERP correlates of predictive processes  
 11 preceding the final chord, we also investigated ERPs elicited by the penultimate  
 12 chord (i.e., the dominant chord preceding the final tonic chord).

13

14

15

FIGURE S1 AROUND HERE

16

17

18 Because we did not have prior hypotheses, ANOVAs were computed for 50 ms  
 19 windows (0-50 ms, 50-100 ms, 100-150 ms, 150-200 ms, 200-250 ms, 250-300 ms,  
 20 300-350 ms, 350-400 ms, 400-450 ms, 450-500 ms) of the penultimate chord with  
 21 factors regularity, cue, anterior-posterior distribution, hemisphere and group (see  
 22 Table S1 for detailed results).

1

2

3

TABLE S1 AROUND HERE

4

5

6 For the time window from 250 to 300 ms, the analysis indicated an interaction  
7 between regularity, cue, anterior-posterior distribution, hemisphere and group (and  
8 visual inspection indicated that this interaction was due to a difference between ERPs  
9 in the cued compared to the non-cued condition in musicians at right anterior  
10 electrodes; see also Fig. S1). Therefore, follow-up ANOVAs were conducted,  
11 separately for each of the anterior ROIs with factors regularity, cue and group,  
12 indicating an effect of group ( $F(1,38) = 4.54, p < 0.05, \text{partial } \eta^2 = 0.11$ ) over right  
13 anterior leads. An independent-samples *t*-test comparing ERPs between  
14 non-musicians and musicians showed that ERPs differed between groups over right  
15 anterior leads ( $t = -2.13, p < 0.05, \text{Cohen's } d = 0.67$ ).

16 For the time windows from 300 to 350 ms and 400 to 450 ms, the analyses  
17 indicated an interaction between regularity, cue, anterior-posterior distribution and  
18 group. Follow-up ANOVAs conducted separately for non-musicians and musicians  
19 with factors regularity, cue and anterior-posterior distribution indicating an effect of  
20 cue (time window 300 – 350 ms:  $F(1,19) = 4.38, p = 0.05, \text{partial } \eta^2 = 0.19$ ) and an  
21 interaction between regularity, cue, and anterior-posterior distribution (time window  
22 300 – 350 ms:  $F(1,19) = 7.75, p < 0.05, \text{partial } \eta^2 = 0.29$ ; time window 400 – 450 ms:

1  $F(1,19) = 4.46, p < 0.05, \text{partial } \eta^2 = 0.19$ ) only in musicians. Follow-up ANOVAs  
2 conducted separately for anterior and posterior ROIs with factors regularity and cue  
3 in musicians, indicating an effect of cue (time window 300 – 350 ms:  $F(1,19) = 5.33, p$   
4  $< 0.05, \text{partial } \eta^2 = 0.22$ ; time window 400 – 450 ms:  $F(1,19) = 3.07, p < 0.05, \text{partial}$   
5  $\eta^2 = 0.14$ ) only in anterior ROI. Paired-sample  $t$ -tests comparing ERPs between cued  
6 and non-cued conditions for the anterior ROI in musicians, reflected that ERPs  
7 elicited in the cued condition were larger than in the non-cued condition for the  
8 anterior ROI (time window 300 – 350 ms:  $t = 2.31, p < 0.05, \text{Cohen's } d = 0.38$ ; time  
9 window 400 – 450 ms:  $t = 2.09, p < 0.05, \text{Cohen's } d = 0.33$ ; see gray-shaded areas in  
10 Fig. S1).

11 Because effects were not observed in multiple successive time windows, these  
12 results have to be treated with caution. Therefore, we provide the data and analysis  
13 of the penultimate chords here to motivate hypothesis of future studies, but we will  
14 not discuss them further.
